# Supplementary material for: Enhanced Power Factor and Ultralow Lattice Thermal Conductivity Induced High Thermoelectric Performance of BiCuTeO/BiCuSeO Superlattice
Source: MDPI journal article supplement (doi:10.3390/ma16124318), 2023-06-11
Supplement: s1 [file s1]

---

# Enhanced power factor and ultralow lattice thermal conductivity induced high thermoelectric performance of BiCuTeO/BiCuSeO superlattice

Xuewen Yang<sup>a,b</sup>, Zhiqian Sun<sup>a,b</sup>, Guixian Ge<sup>\*a,b</sup>, Jueming Yang<sup>\*a,b</sup>

<sup>a</sup>College of Science/Xinjiang Production & Construction Corps Key Laboratory of Advanced Energy Storage Materials and Technology, Shihezi University, Shihezi City 832000, China

<sup>b</sup>Xinjiang Production and Construction Corps Key Laboratory of Oasis Town and Mountain-basin System Ecology, Shihezi University, Shihezi City 832000, China

\*Corresponding authors: geguixian@126.com (G. Ge); juemingyang11@gmail.com (J. Yang);

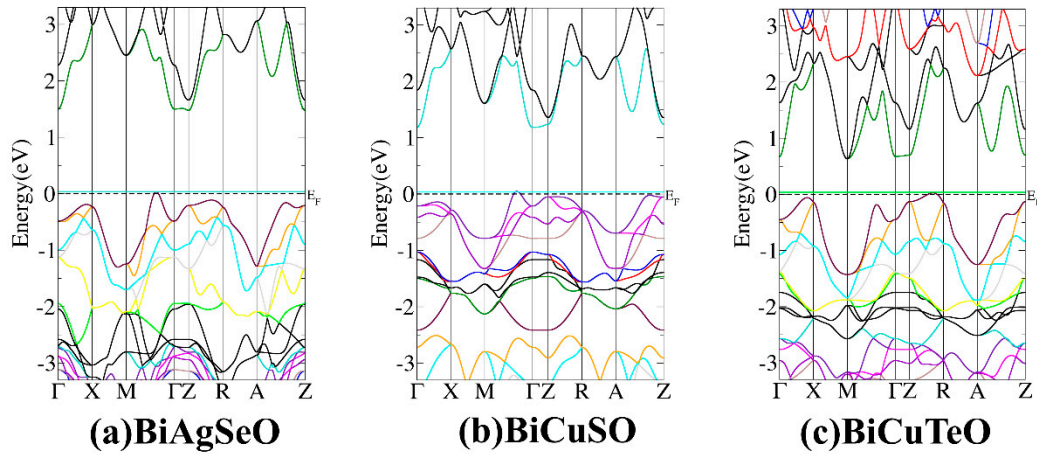

Fig. S1 The band structures of BiMChO.

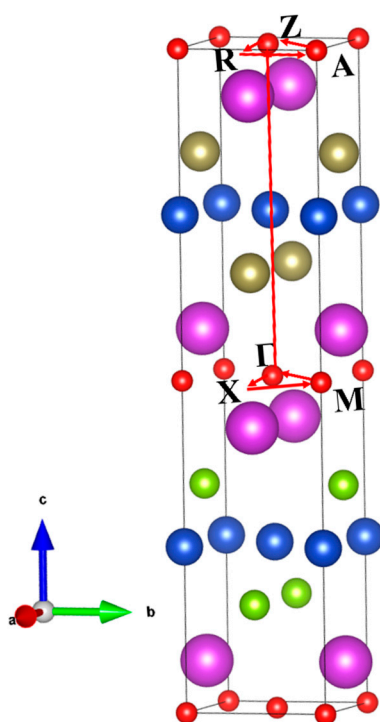

Fig. S2 The high symmetry points of BiMChO superlattices.
